# Supplementary material for: Incidence, Risk Factors, and Outcomes of Symptomatic Bone Cement Displacement following Percutaneous Kyphoplasty for Osteoporotic Vertebral Compression Fracture: A Single Center Study
Source: MDPI journal article supplement (doi:10.3390/jcm11247530), 2022-12-19
Supplement: s1 [file s1]

STROBE statement—a checklist of items that should be included in reports of observational studies.

|                          | Item No. | Recommendation                                                                                                                                                                               | Page No. | Relevant text from manuscript         |
|--------------------------|----------|----------------------------------------------------------------------------------------------------------------------------------------------------------------------------------------------|----------|---------------------------------------|
| Title and abstract       | 1        | (a) Indicate the study's design with a commonly used term in the title or the abstract                                                                                                       | 1        | Line 23 "retrospective study"         |
|                          |          | (b) Provide in the abstract an informative and balanced summary of what was done and what was found                                                                                          | 1–2      | Lines 23–49                           |
| <b>Introduction</b>      |          |                                                                                                                                                                                              |          |                                       |
| Background/rationale     | 2        | Explain the scientific background and rationale for the investigation being reported                                                                                                         | 2        | Lines 54–76                           |
| Objectives               | 3        | State the specific objectives, including any prespecified hypotheses                                                                                                                         | 2        | Lines 76–83                           |
| <b>Methods</b>           |          |                                                                                                                                                                                              |          |                                       |
| Study design             | 4        | Present the key elements of the study's design early in the paper                                                                                                                            | 2–3      | Lines 86–94 and Figure 1              |
| Setting                  | 5        | Describe the setting, locations, and relevant dates, including periods of recruitment, exposure, follow-up, and data collection                                                              | 2–3      | Lines 86–94 and Figure 1              |
| Participants             | 6        | (a) <i>Cohort study</i> : Give the eligibility criteria, the sources and methods of participant selection, and describe methods of follow-up                                                 | 3        | Figure 1                              |
|                          |          | <i>Case-control study</i> : Give the eligibility criteria, the sources and methods of case ascertainment and control selection, and the rationale for the choice of cases and controls       |          |                                       |
|                          |          | <i>Cross-sectional study</i> : Give the eligibility criteria and the sources and methods of participant selection                                                                            |          |                                       |
| Variables                | 7        | (b) <i>Cohort study</i> : For matched studies, give matching criteria and the number of exposed and unexposed                                                                                | 2–3      | Lines 94–101 and Figures 1 and 2      |
|                          |          | <i>Case-control study</i> : For matched studies, give matching criteria and the number of controls per case                                                                                  |          |                                       |
| Data sources/measurement | 8*       | Clearly define all outcomes, exposures, predictors, potential confounders, and effect modifiers, and give diagnostic criteria if applicable                                                  | 2–3      | Lines 94–101 and Figures 1 and 2      |
|                          |          | For each variable of interest, give sources of data and details of methods of assessment (measurement), and describe the comparability of assessment methods if there is more than one group | 3–6      | Lines 114–170, Figures 2, 3, 4, and 5 |
| Bias                     | 9        | Describe any efforts to address potential sources of bias                                                                                                                                    | 7        | Lines 194–197                         |
| Study size               | 10       | Explain how the study size was arrived at                                                                                                                                                    | 3        | Figure 1                              |

Continued on the next page

|                        |     |                                                                                                                                                                                                                                                                                                                            |     |                                      |
|------------------------|-----|----------------------------------------------------------------------------------------------------------------------------------------------------------------------------------------------------------------------------------------------------------------------------------------------------------------------------|-----|--------------------------------------|
| Quantitative variables | 11  | Explain how quantitative variables were handled in the analyses, and if applicable, describe which groupings were chosen and why                                                                                                                                                                                           | 7   | Lines 186–194                        |
|                        |     | (a) Describe all statistical methods, including those used to control for confounding                                                                                                                                                                                                                                      | 7   | Lines 184–198                        |
|                        |     | (b) Describe any methods used to examine subgroups and interactions                                                                                                                                                                                                                                                        | 7   | Lines 184–198                        |
|                        |     | (c) Explain how missing data were addressed                                                                                                                                                                                                                                                                                | 3   | Figure 1                             |
| Statistical methods    | 12  | (d) <i>Cohort study</i> : If applicable, explain how the loss to follow-up was addressed<br><i>Case-control study</i> : If applicable, explain how the matching of cases and controls was addressed<br><i>Cross-sectional study</i> : If applicable, describe analytical methods taking the sampling strategy into account | 3   | Figure 1                             |
|                        |     | (e) Describe any sensitivity analyses                                                                                                                                                                                                                                                                                      |     |                                      |
| <b>Results</b>         |     |                                                                                                                                                                                                                                                                                                                            |     |                                      |
| Participants           | 13* | (a) Report the number of individuals at each stage of the study (e.g., numbers potentially eligible, examined for eligibility, confirmed eligible, included in the study, completing follow-up, and analyzed)                                                                                                              | 3   | Figure 1                             |
|                        |     | (b) Give reasons for non-participation at each stage                                                                                                                                                                                                                                                                       | 3   | Figure 1                             |
|                        |     | (c) Consider the use of a flow diagram                                                                                                                                                                                                                                                                                     | 3   | Figure 1                             |
| Descriptive data       | 14* | (a) Give characteristics of study participants (e.g., demographic, clinical, social) and information on exposures and potential confounders                                                                                                                                                                                | 7   | Lines 200–209, Table 2, and Figure 6 |
|                        |     | (b) Indicate the number of participants with missing data for each variable of interest                                                                                                                                                                                                                                    | 3   | Figure 1                             |
|                        |     | (c) <i>Cohort study</i> : Summarize follow-up time (e.g., average and total amount)                                                                                                                                                                                                                                        | 3   | Figure 1                             |
| Outcome data           | 15* | <i>Cohort study</i> : Report numbers of outcome events or summary measures over time<br><i>Case-control study</i> : Report numbers in each exposure category or summary measures of exposure<br><i>Cross-sectional study</i> : Report numbers of outcome events or summary measures                                        | 9   | Lines 236–243 and Table 3            |
| Main results           | 16  | (a) Give the unadjusted estimates and, if applicable, confounder-adjusted estimates and their precision (e.g., 95% confidence interval); make clear which confounders were adjusted for and why they were included                                                                                                         | 10  | Lines 247–256 and Table 4            |
|                        |     | (b) Report category boundaries when continuous variables were categorized                                                                                                                                                                                                                                                  | 8–9 | Lines 216–243 and Tables 2 and 3     |
|                        |     | (c) If relevant, consider translating estimates of relative risk into absolute risk for a meaningful time period                                                                                                                                                                                                           |     |                                      |

Continued on the next page

|                          |    |                                                                                                                                                                                |            |                                            |
|--------------------------|----|--------------------------------------------------------------------------------------------------------------------------------------------------------------------------------|------------|--------------------------------------------|
| Other analyses           | 17 | Report other analyses done (e.g., analyses of subgroups and interactions and sensitivity analyses)                                                                             | 7–8 and 10 | Lines 207–209, 260–269, and Tables 1 and 5 |
| <b>Discussion</b>        |    |                                                                                                                                                                                |            |                                            |
| Key results              | 18 | Summarize key results with reference to study objectives                                                                                                                       | 11         | Lines 278–291                              |
| Limitations              | 19 | Discuss the limitations of the study, taking into account sources of potential bias or imprecision and both the direction and magnitude of any potential bias                  | 14         | Lines 428–433                              |
| Interpretation           | 20 | Give a cautious overall interpretation of results considering objectives, limitations, the multiplicity of analyses, results from similar studies, and other relevant evidence | 12–14      | Lines 306–427                              |
| Generalizability         | 21 | Discuss the generalizability (external validity) of the study results                                                                                                          | 12–14      | Lines 306–427                              |
| <b>Other information</b> |    |                                                                                                                                                                                |            |                                            |
| Funding                  | 22 | Give the source of funding and the role of the funders for the present study and for the original study on which the present article is based, if applicable                   | 15         | Lines 448–449                              |

\*Give information separately for cases and controls in case-control studies and, if applicable, for exposed and unexposed groups in the cohort and cross-sectional studies.

**Note:** An explanation and elaboration article discusses each checklist item and gives methodological background and published examples of transparent reporting. The STROBE checklist is best used in conjunction with this article (freely available on the Web sites of PLoS Medicine at <http://www.plosmedicine.org/>, Annals of Internal Medicine at <http://www.annals.org/>, and Epidemiology at <http://www.epidem.com/>). Information on the STROBE Initiative is available at [www.strobe-statement.org](http://www.strobe-statement.org).
